# Supplementary material for: Serum amyloid A expression in liver promotes synovial macrophage activation and chronic arthritis via NFAT5
Source: J Clin Invest. 2024 Mar 1;134(5):e167835. doi: 10.1172/JCI167835 (PMC10904059; doi:10.1172/JCI167835)
Supplement: Unedited blot and gel images [file jci-134-167835-s126.pdf]

Uncropped blot for Figure 1A (upper panel)

Anti-NFAT5

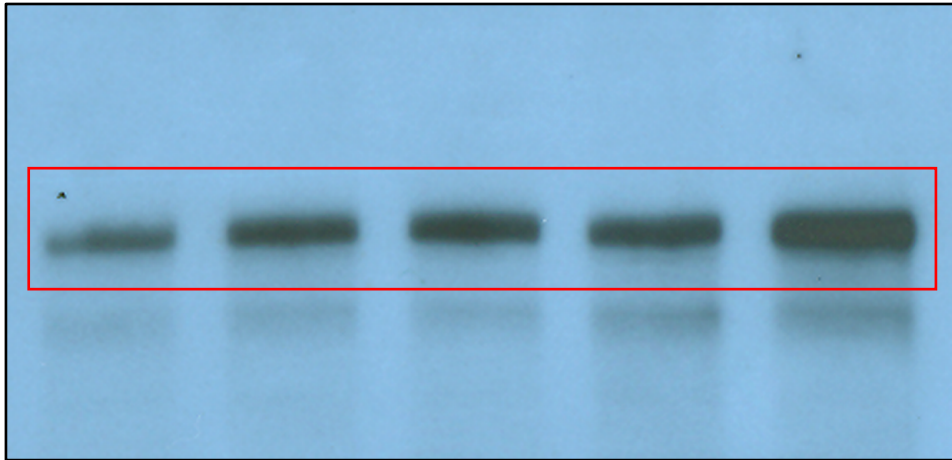

Anti- $\beta$ -actin

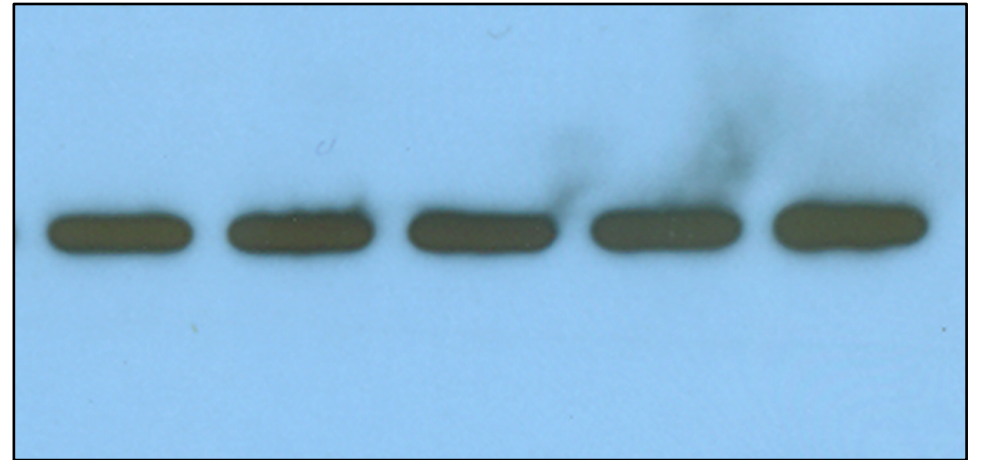

Uncropped image of the Western blot shown in Figure 1A (upper panel).

## Uncropped blot for Figure 1A (lower panel)

Anti-NFAT5

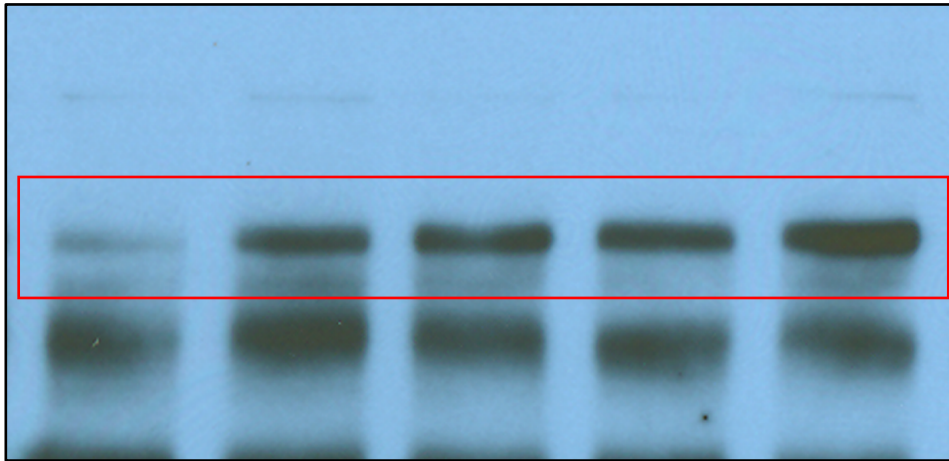

Anti- $\beta$ -actin

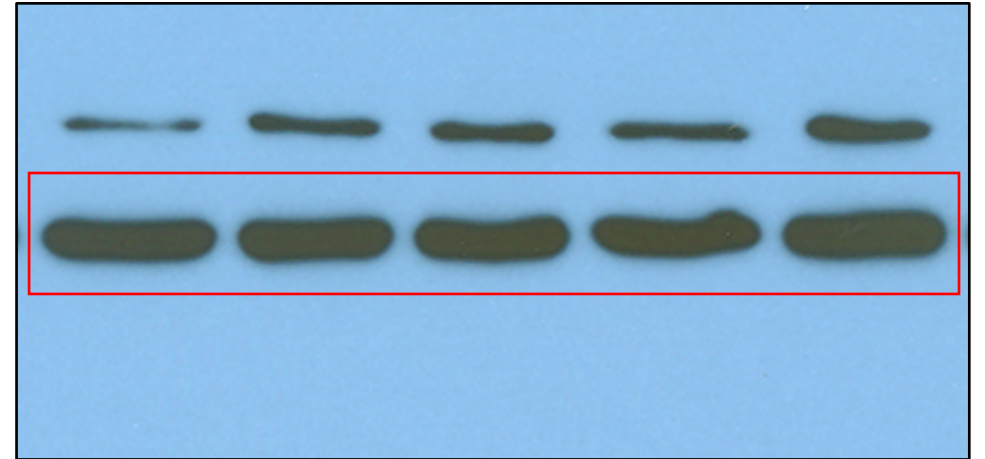

Uncropped image of the Western blot shown in Figure 1A (lower panel).

Uncropped blot for Figure 1B

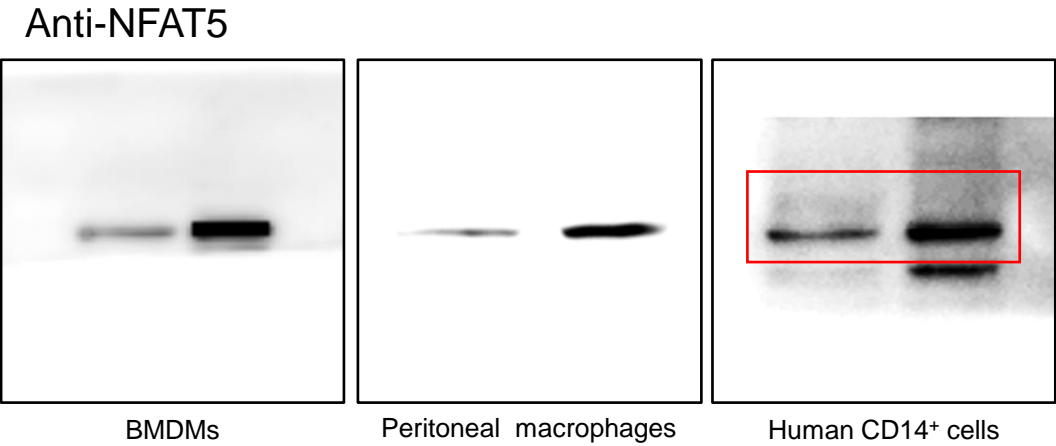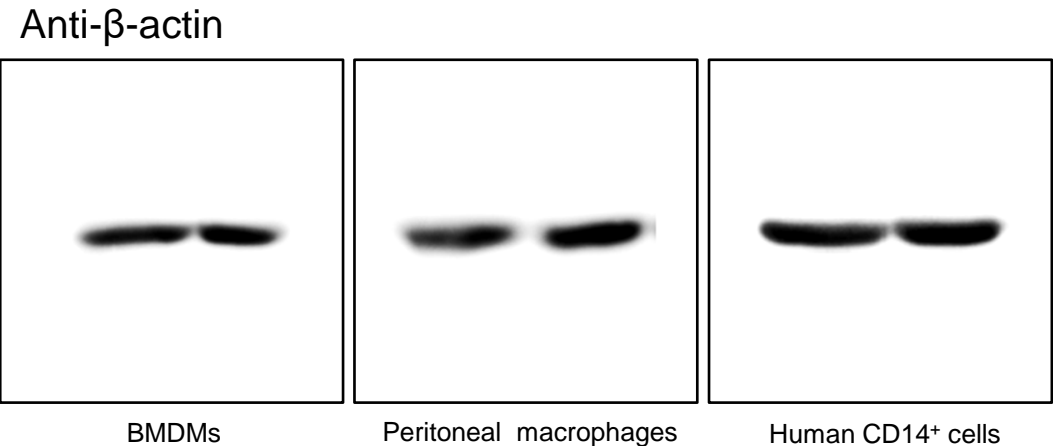

Uncropped image of the Western blot shown in Figure 1B.

## Uncropped blot for Figure 2A

Anti-NFAT5

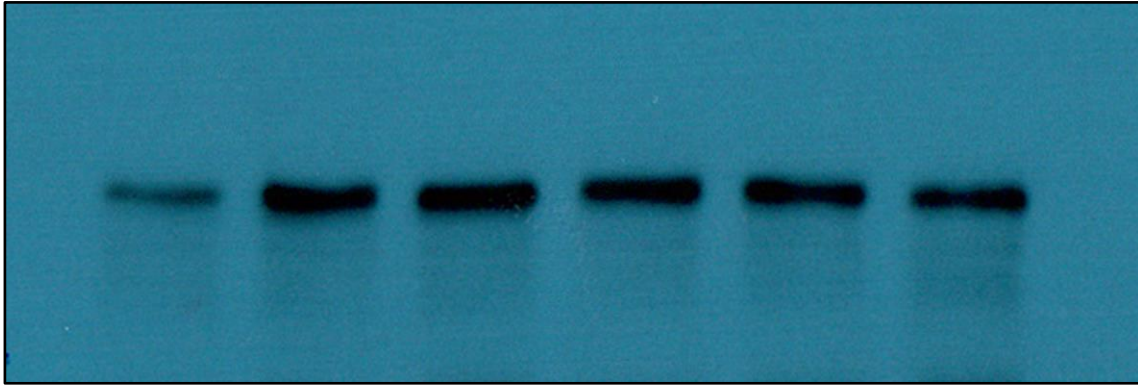

Anti- $\beta$ -actin

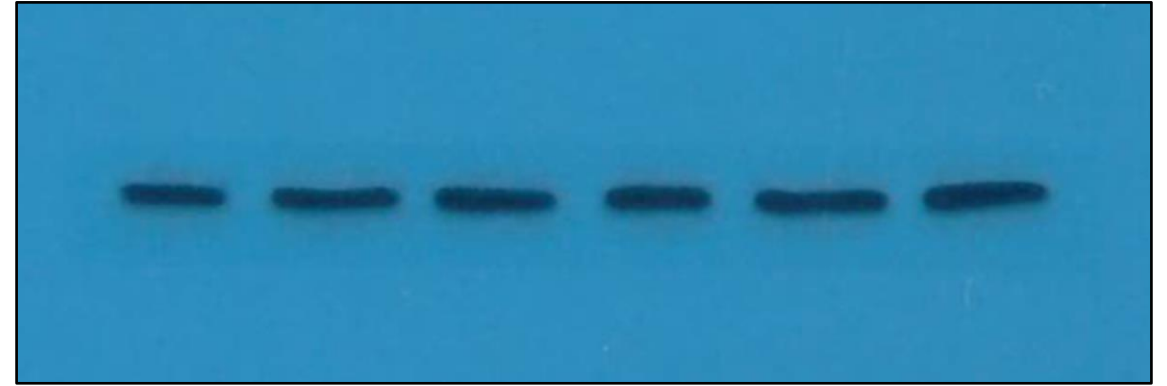

Uncropped image of the Western blot shown in Figure 2A.

## Uncropped blot for Figure 2B

Anti-NFAT5

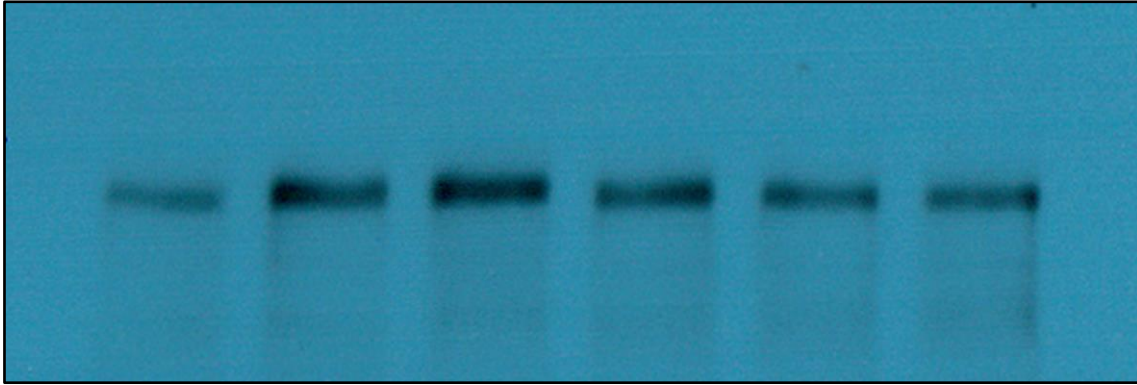

Anti- $\beta$ -actin

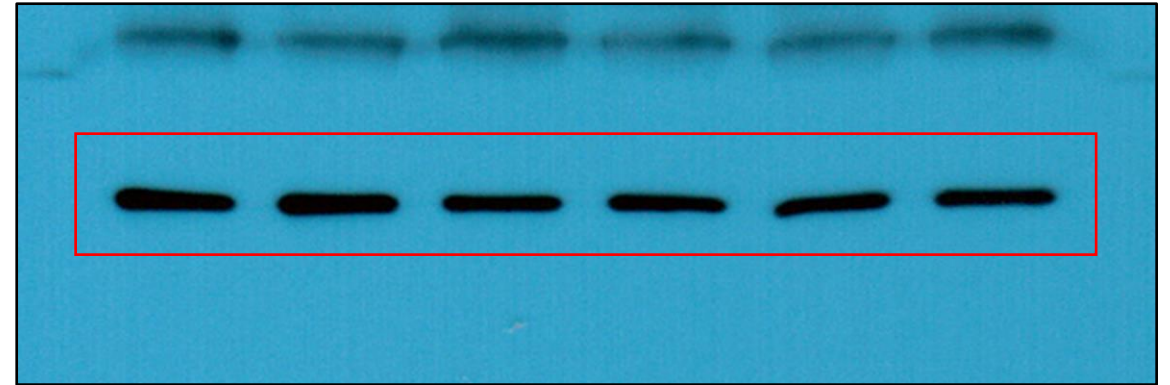

Uncropped image of the Western blot shown in Figure 2B.

## Uncropped blot for Figure 2C

Anti-NFAT5

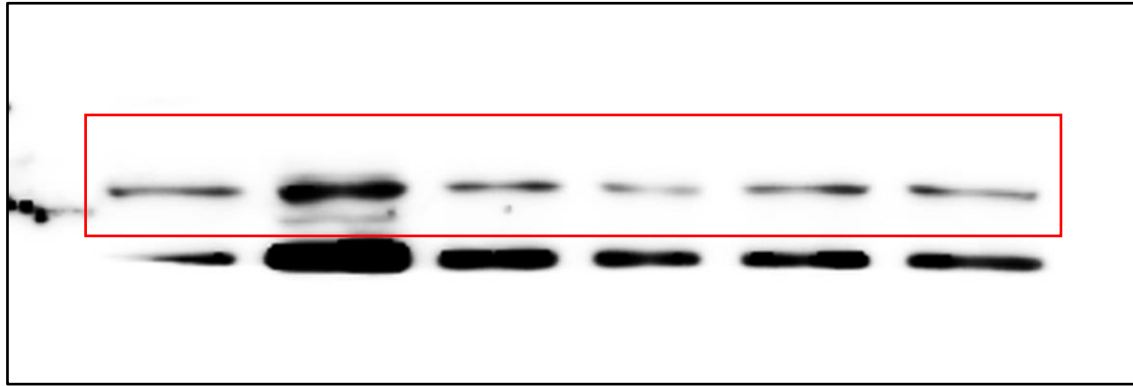

Anti- $\beta$ -actin

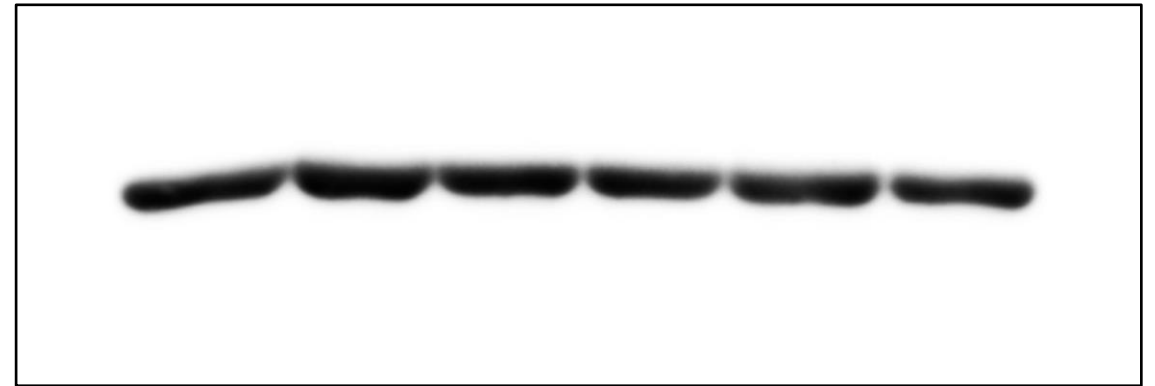

Uncropped image of the Western blot shown in Figure 2C.

## Uncropped blot for Figure 2D

Anti-*p*-p38

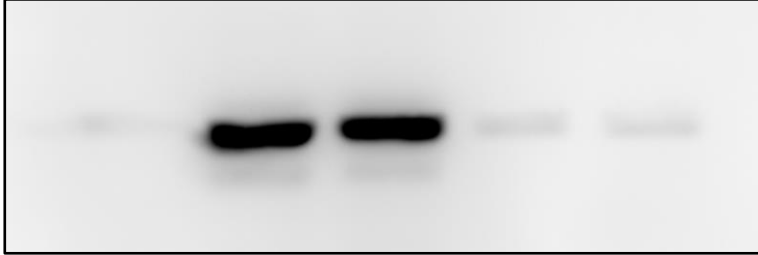

Anti-*p*-ERK 1/2

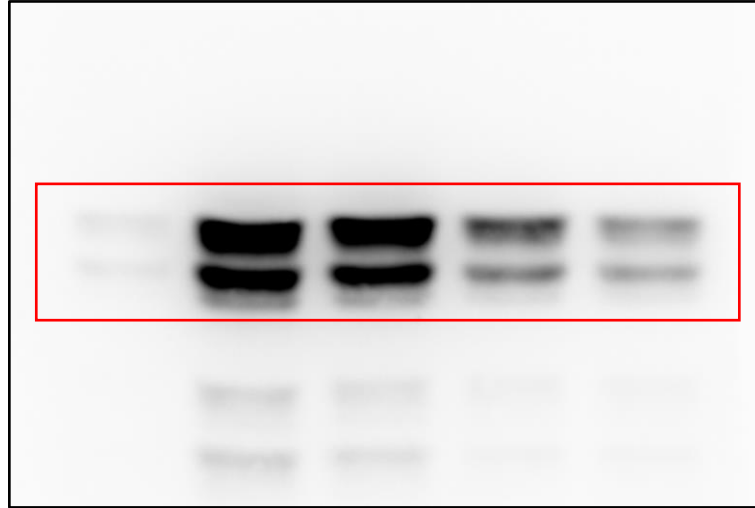

Anti-*p*-JNK 1/2

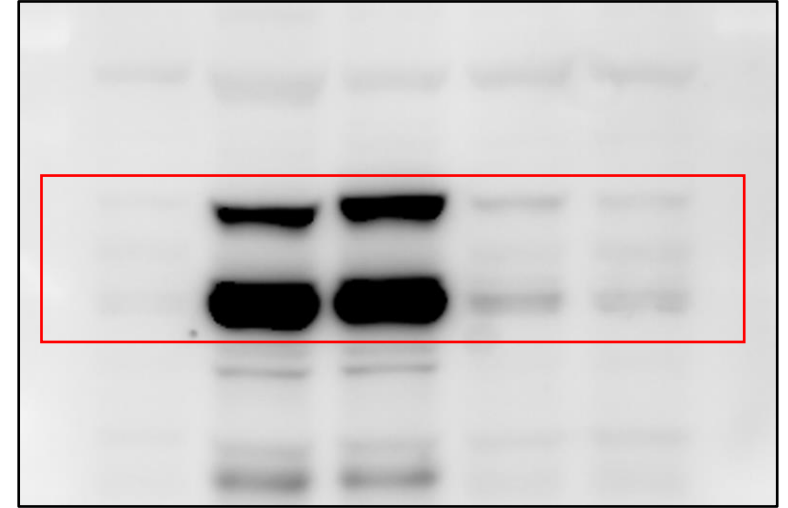

Anti-*p*-AKT

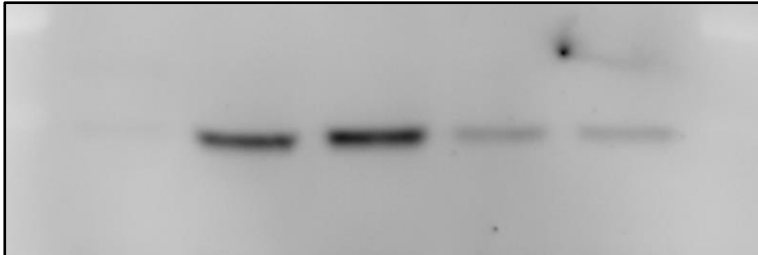

Anti-p38

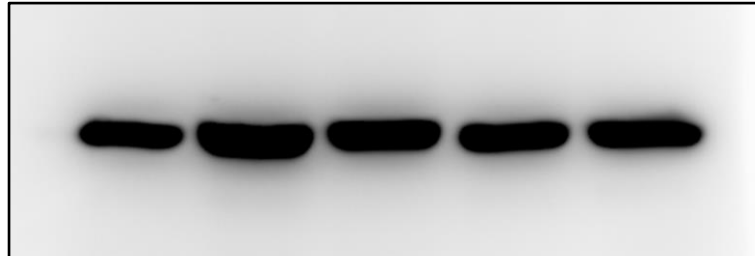

Anti- $\beta$ -actin

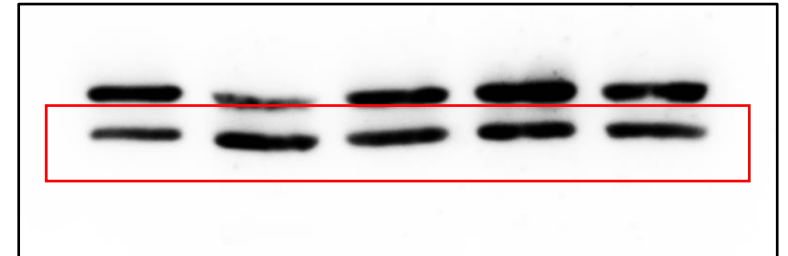

Uncropped image of the Western blot shown in Figure 2D.

## Uncropped blot for Figure 2E

Anti-*p*-p38

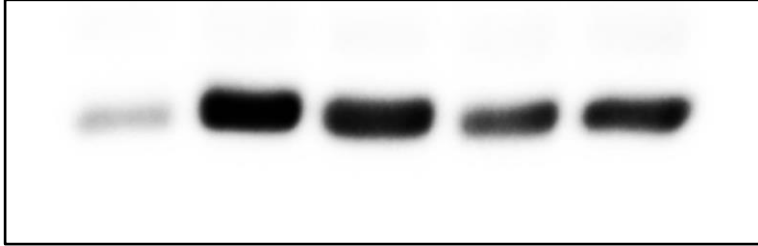

Anti-*p*-ERK 1/2

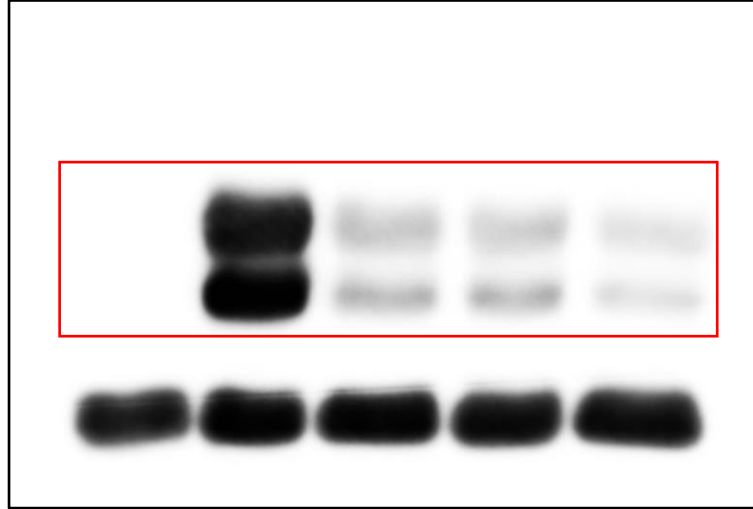

Anti-*p*-JNK 1/2

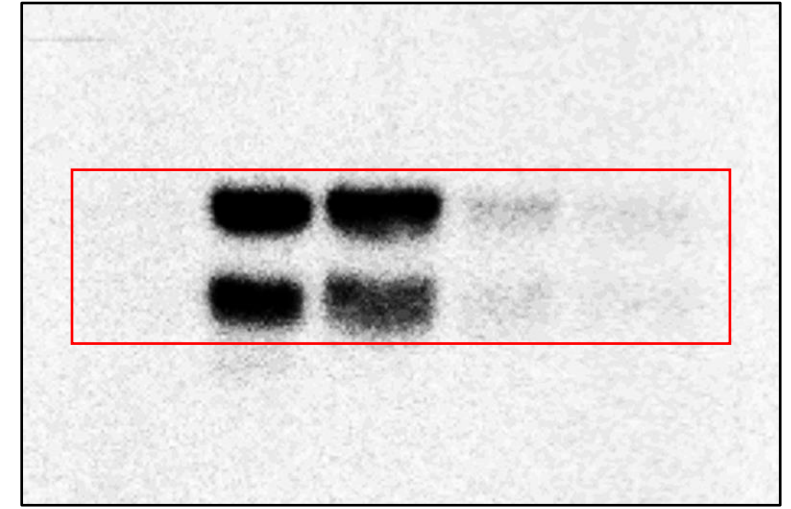

Anti-*p*-AKT

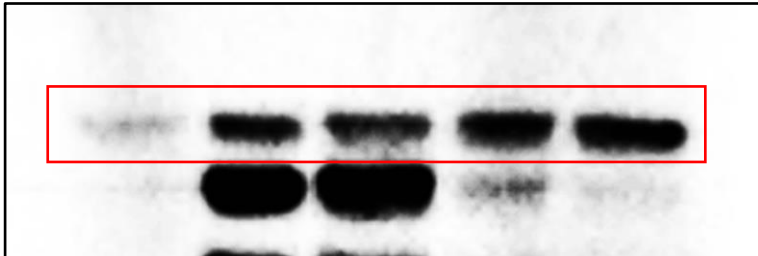

Anti-AKT

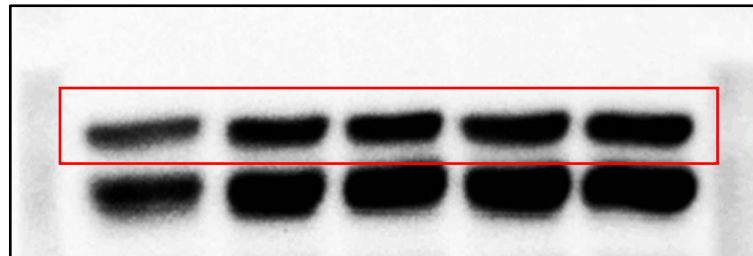

Anti-GAPDH

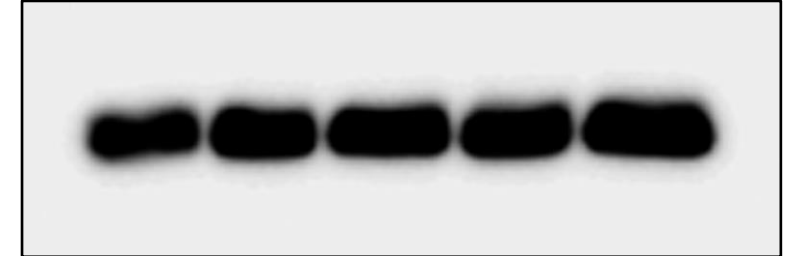

Uncropped image of the Western blot shown in Figure 2E.

## Uncropped blot for Figure 2F

Anti-NFAT5

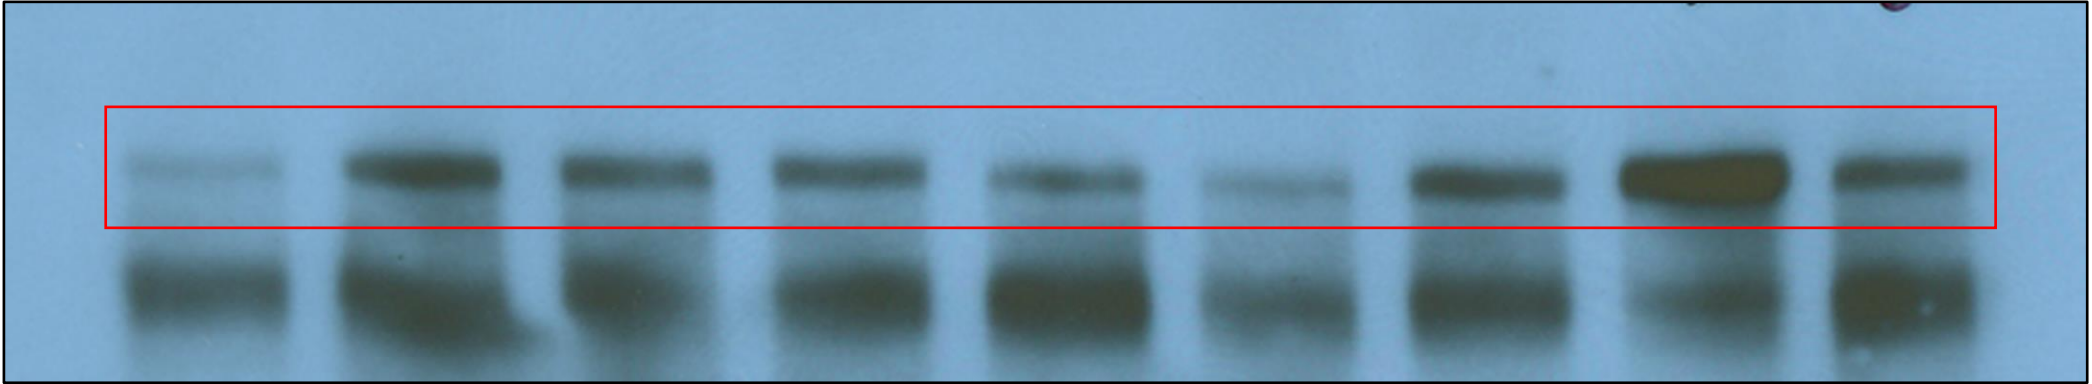

Anti- $\beta$ -actin

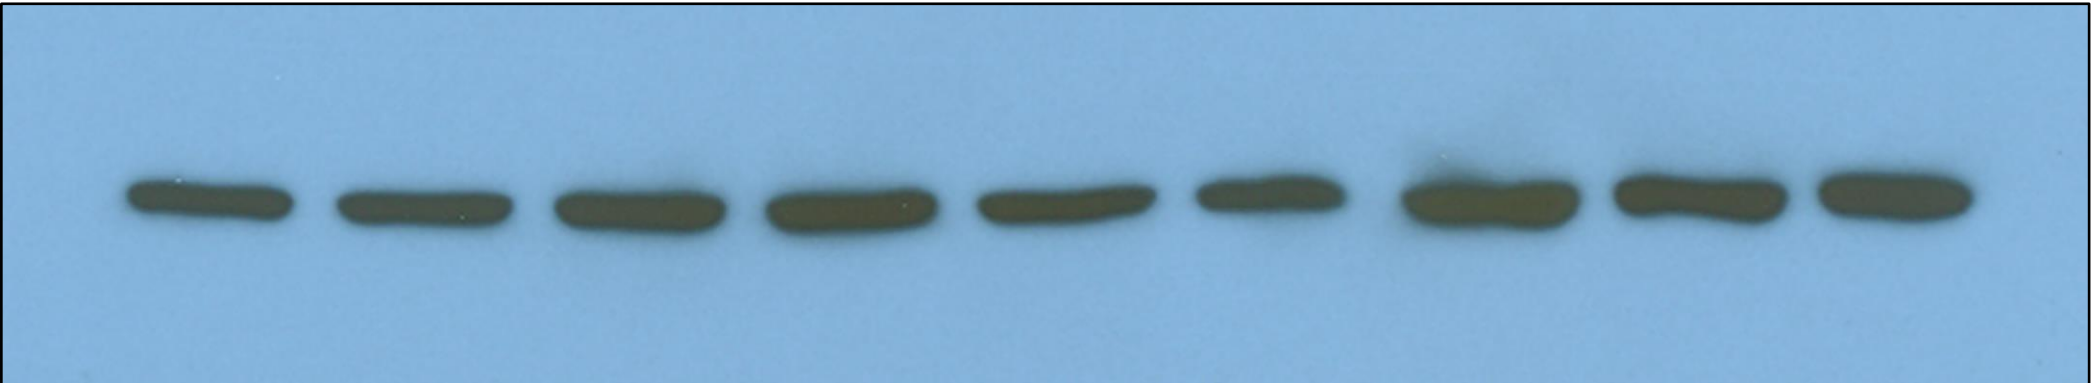

Uncropped image of the Western blot shown in Figure 2F.

## Uncropped blot for Figure 2G

Anti-NFAT5

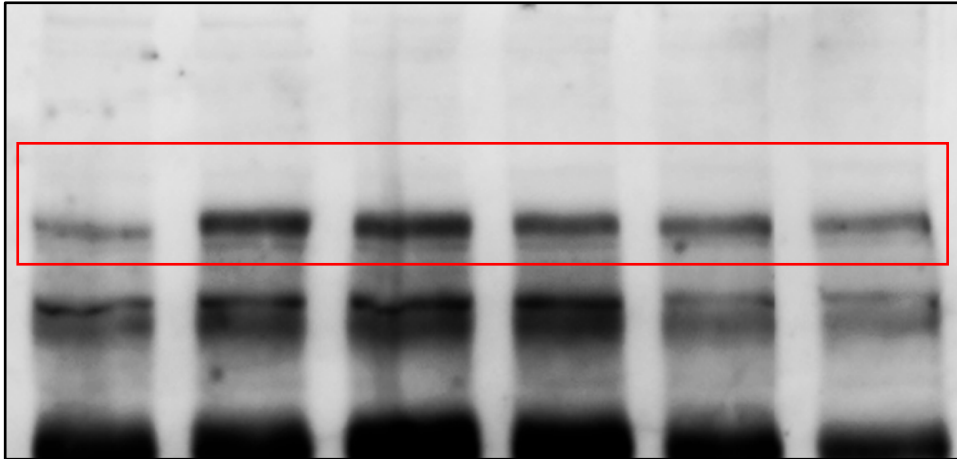

Anti-GAPDH

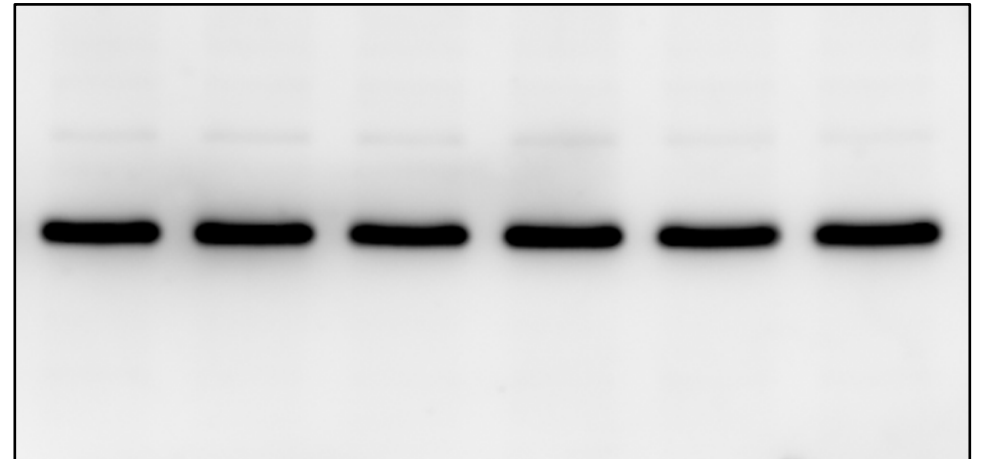

Uncropped image of the Western blot shown in Figure 2G.

## Uncropped blot for Figure 2H

Anti-NFAT5

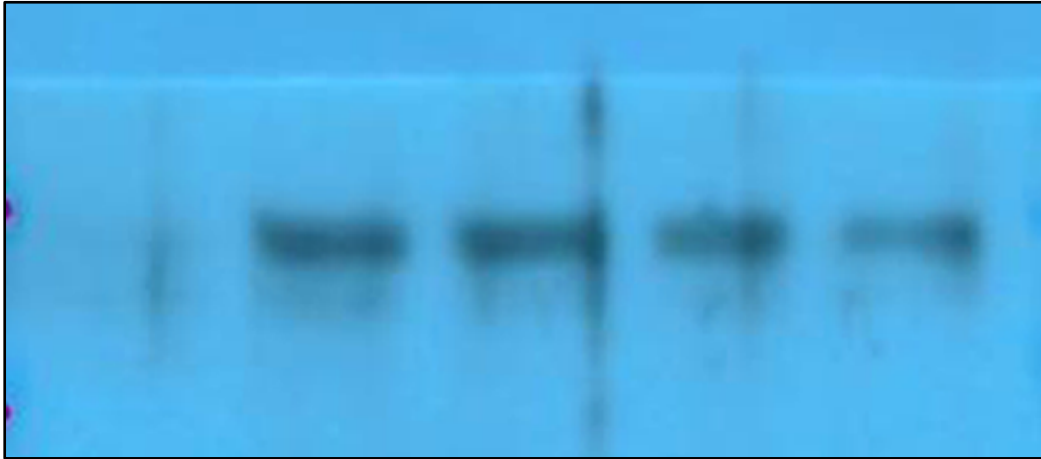

Anti- $\beta$ -actin

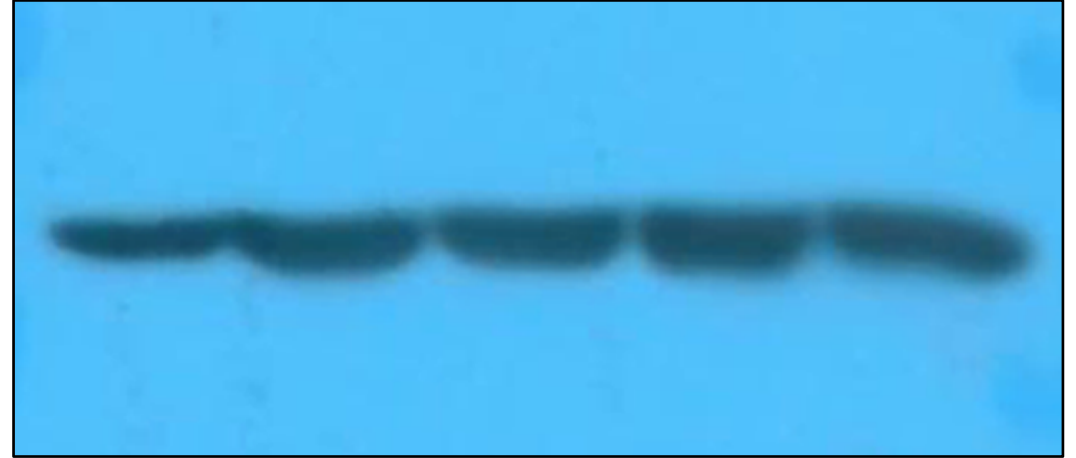

Uncropped image of the Western blot shown in Figure 2H.

## Uncropped blot for Figure 2I

Anti-NFAT5

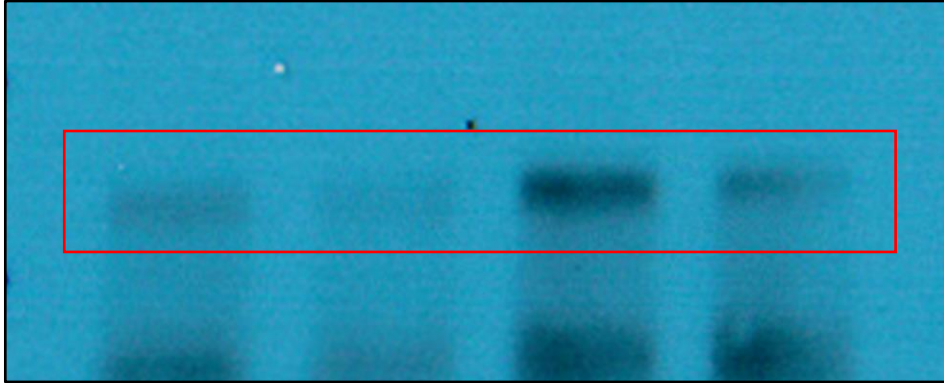

Anti- $\beta$ -actin

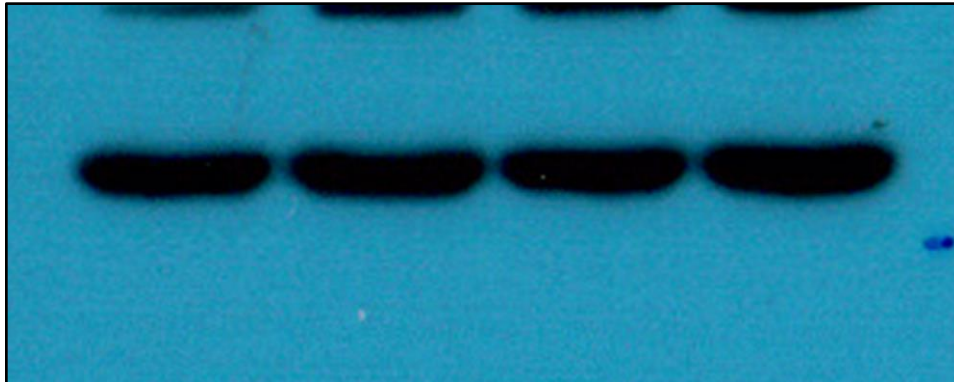

Anti-Total JNK1/2

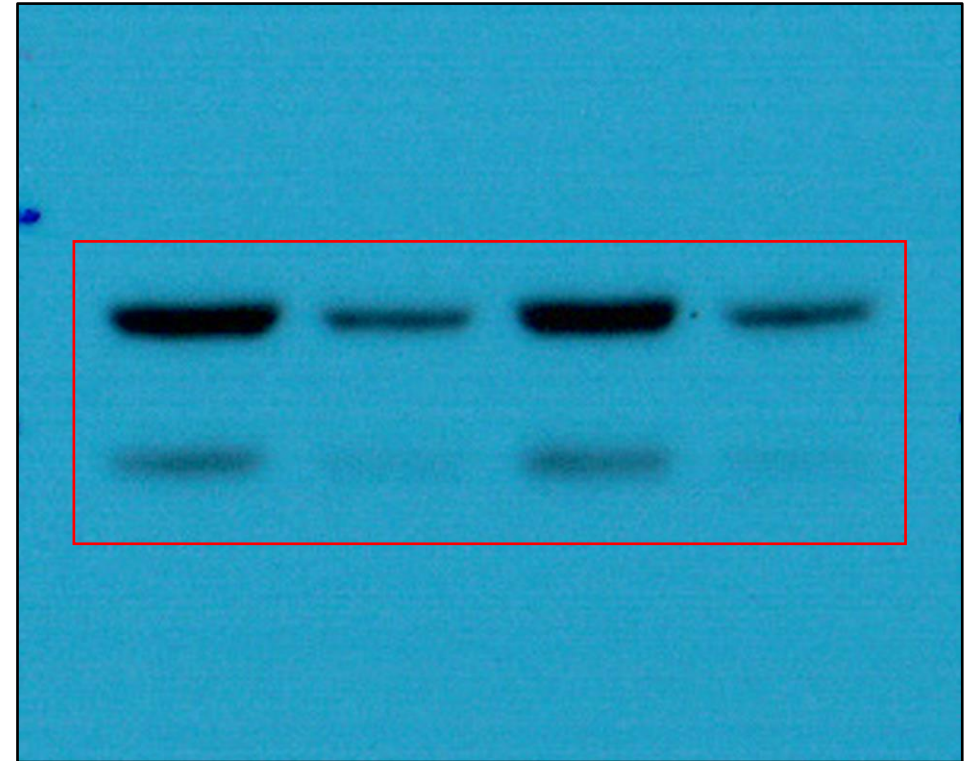

Uncropped image of the Western blot shown in Figure 2I.

## Uncropped blot for Figure 2J

Anti-*p*-JNK 1/2

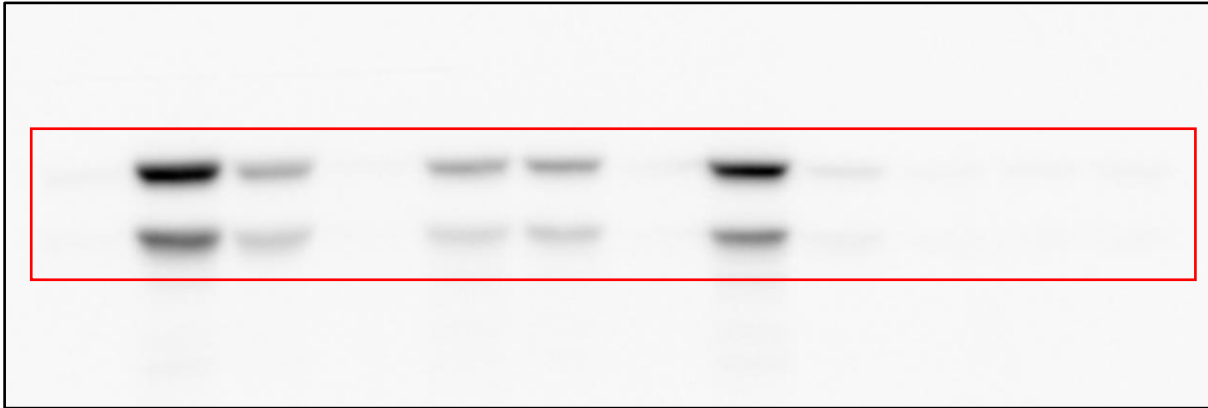

Anti-JNK1/2

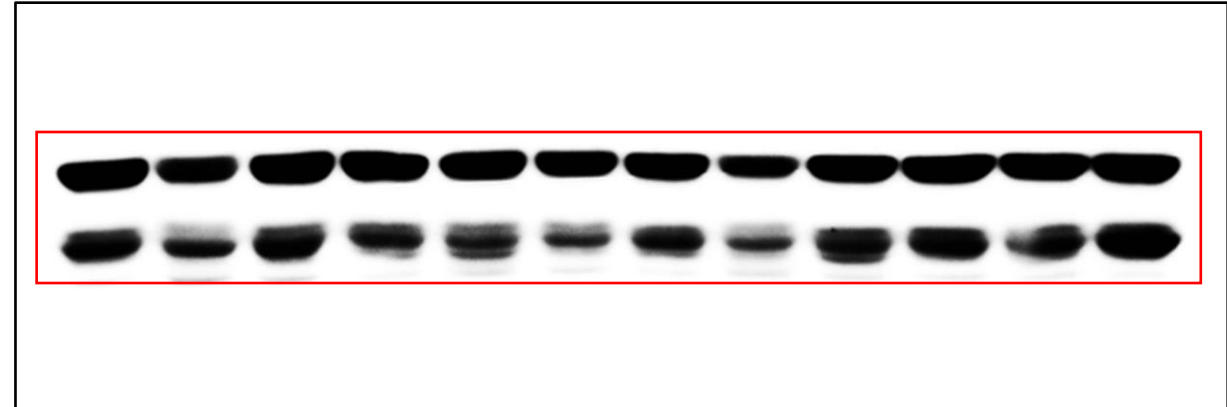

Anti- $\beta$ -actin

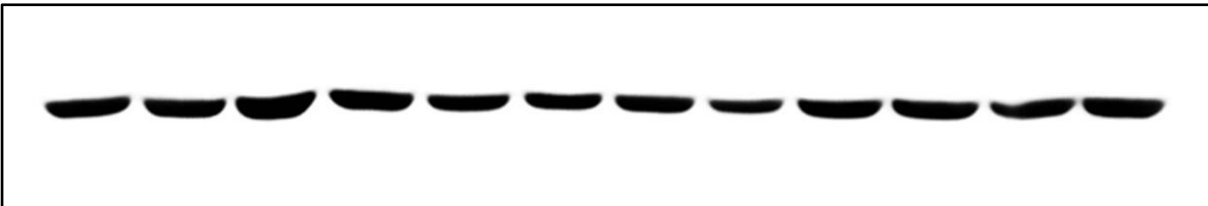

Uncropped image of the Western blot shown in Figure 2J.

## Uncropped blot for Supplemental Figure 1A

Anti-NFAT5

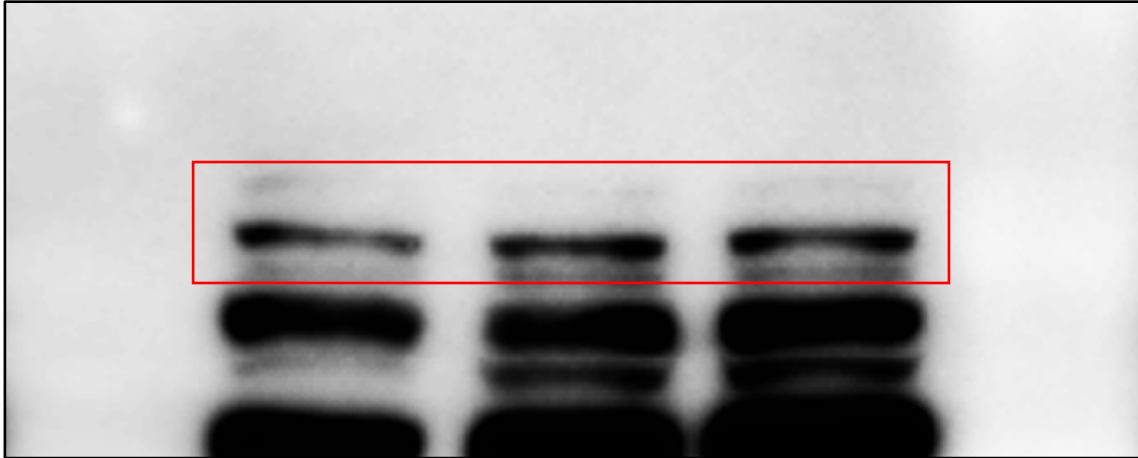

Anti-GAPDH

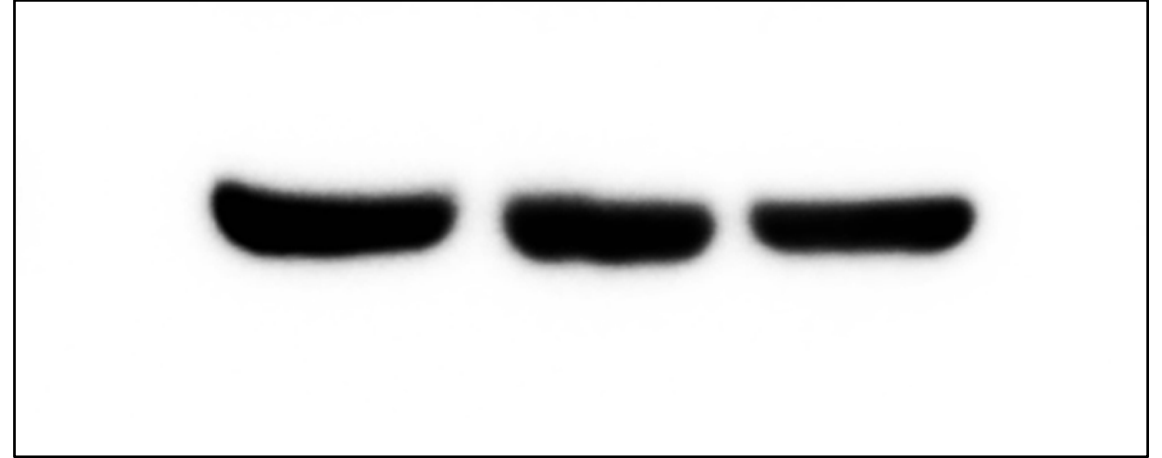

Uncropped image of the Western blot shown in Supplemental Figure 1A.

## Uncropped blot for Supplemental Figure 1B

Anti-NFAT5

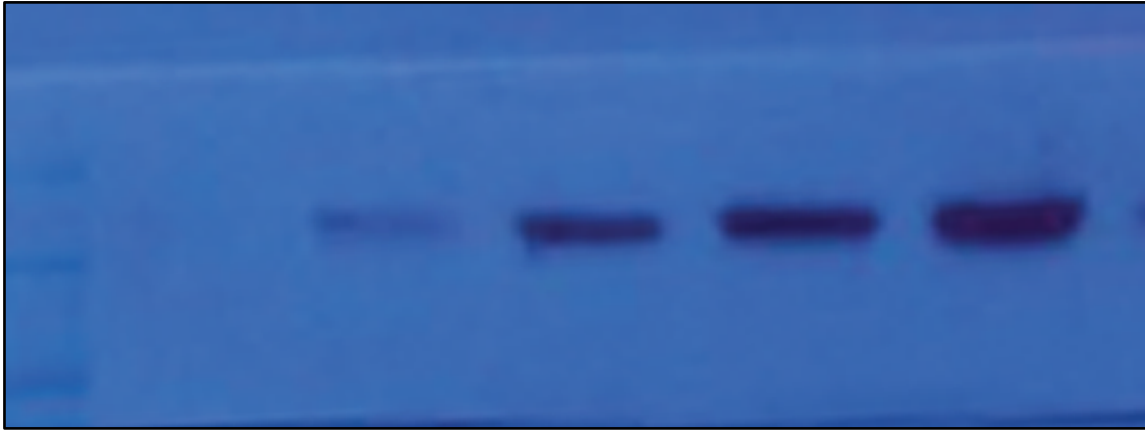

Anti-GAPDH

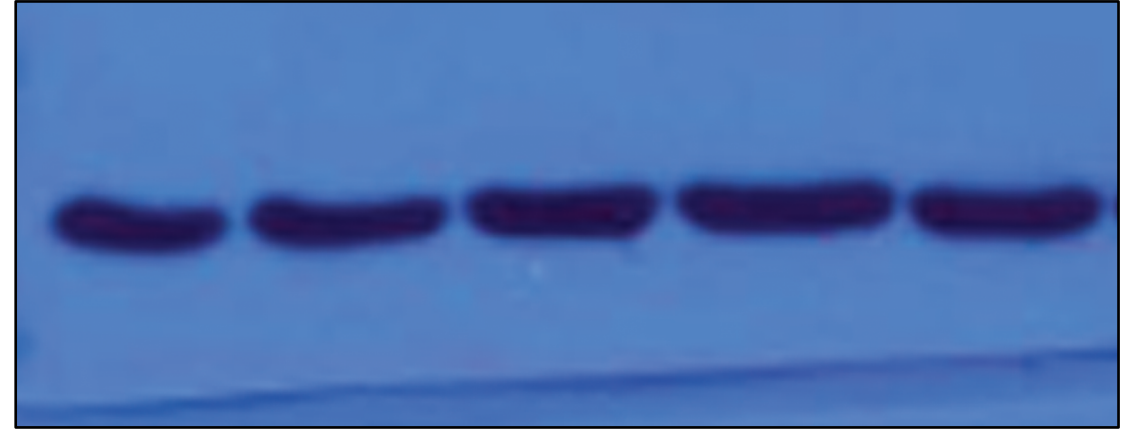

Uncropped image of the Western blot shown in Supplemental Figure 1B.

## Uncropped blot for Supplemental Figure 3A

Anti-NFAT5

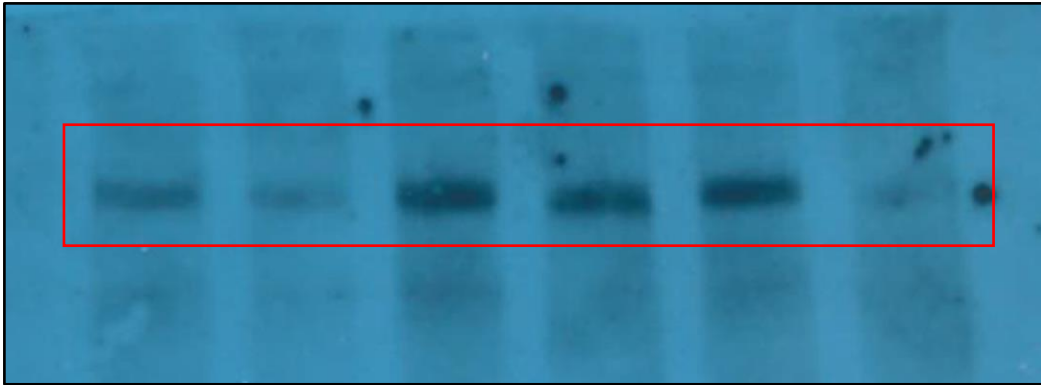

Anti- $\beta$ -actin

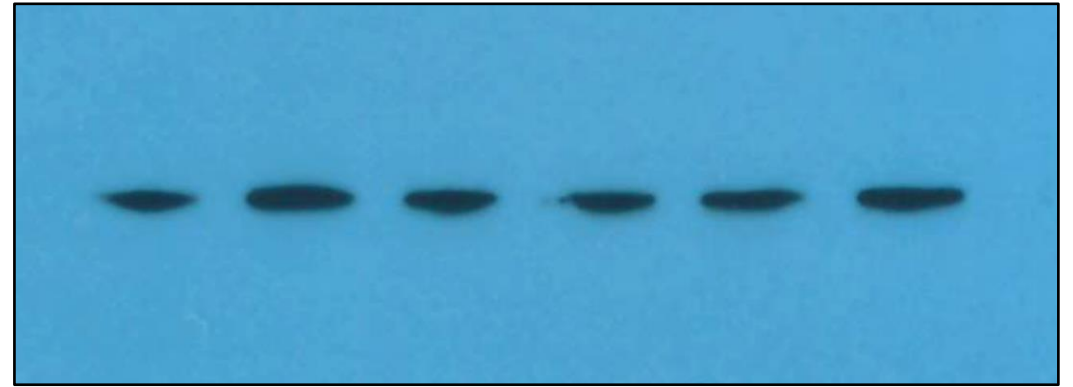

Uncropped image of the Western blot shown in Supplemental Figure 3A.

## Uncropped blot for Supplemental Figure 3B

Anti-NFAT5

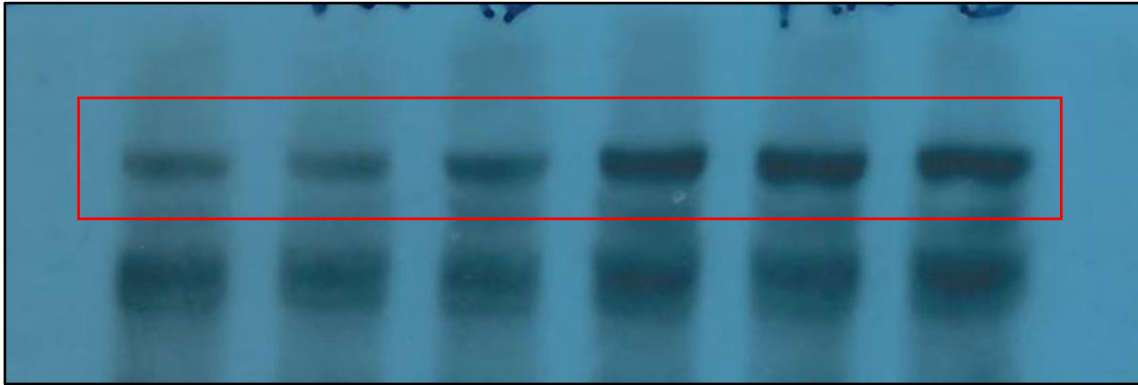

Anti- $\beta$ -actin

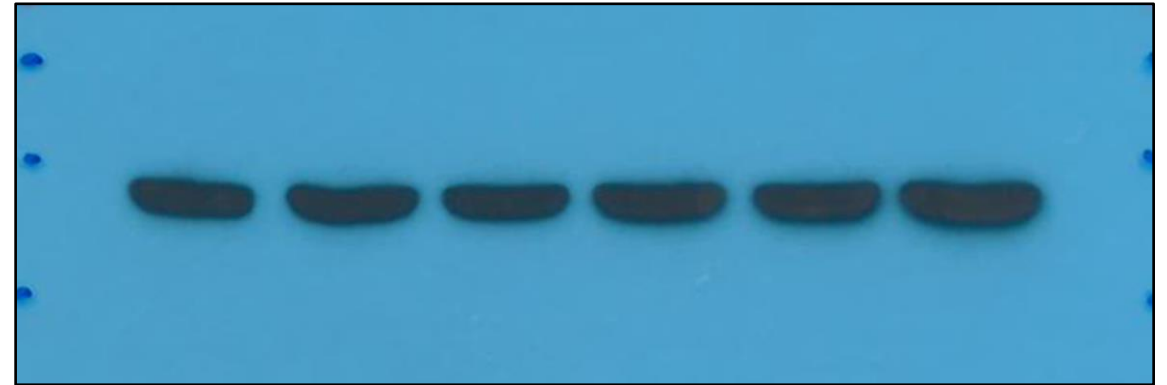

Uncropped image of the Western blot shown in Supplemental Figure 3B.

## Uncropped blot for Supplemental Figure 3C

Anti-NFAT5

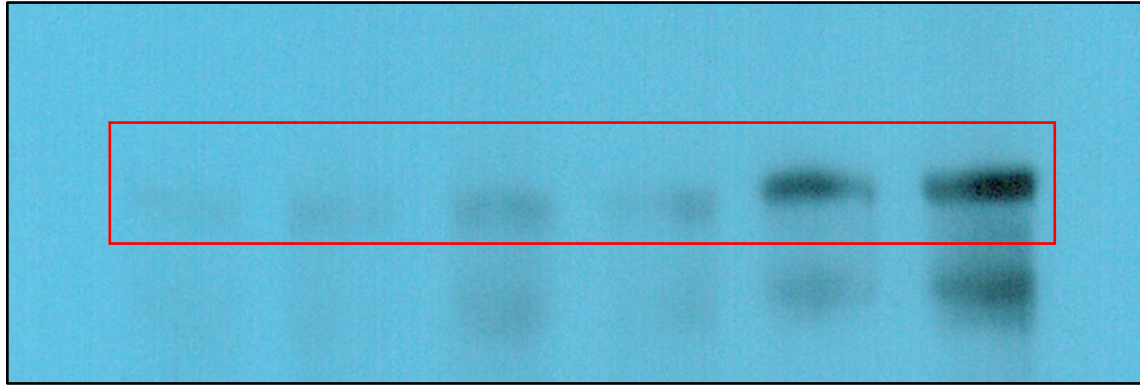

Anti- $\beta$ -actin

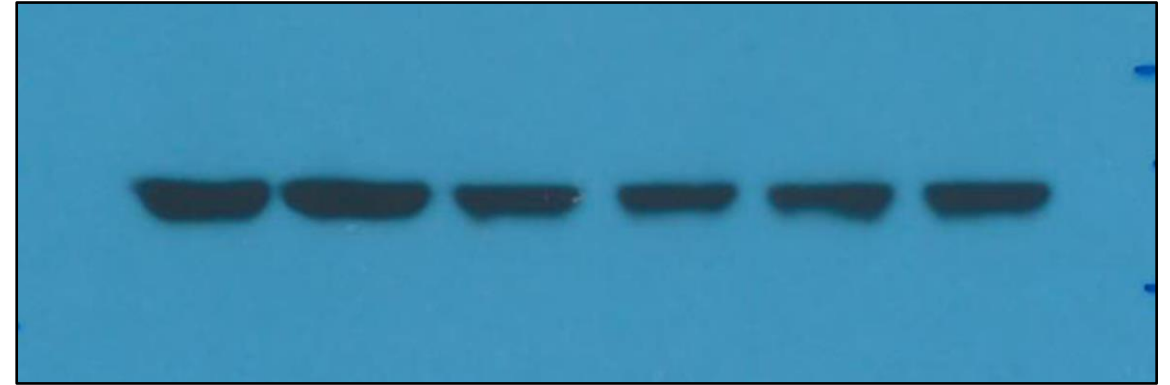

Uncropped image of the Western blot shown in Supplemental Figure 3C.

Uncropped blot for Supplemental Figure 4A

Anti-NFAT5

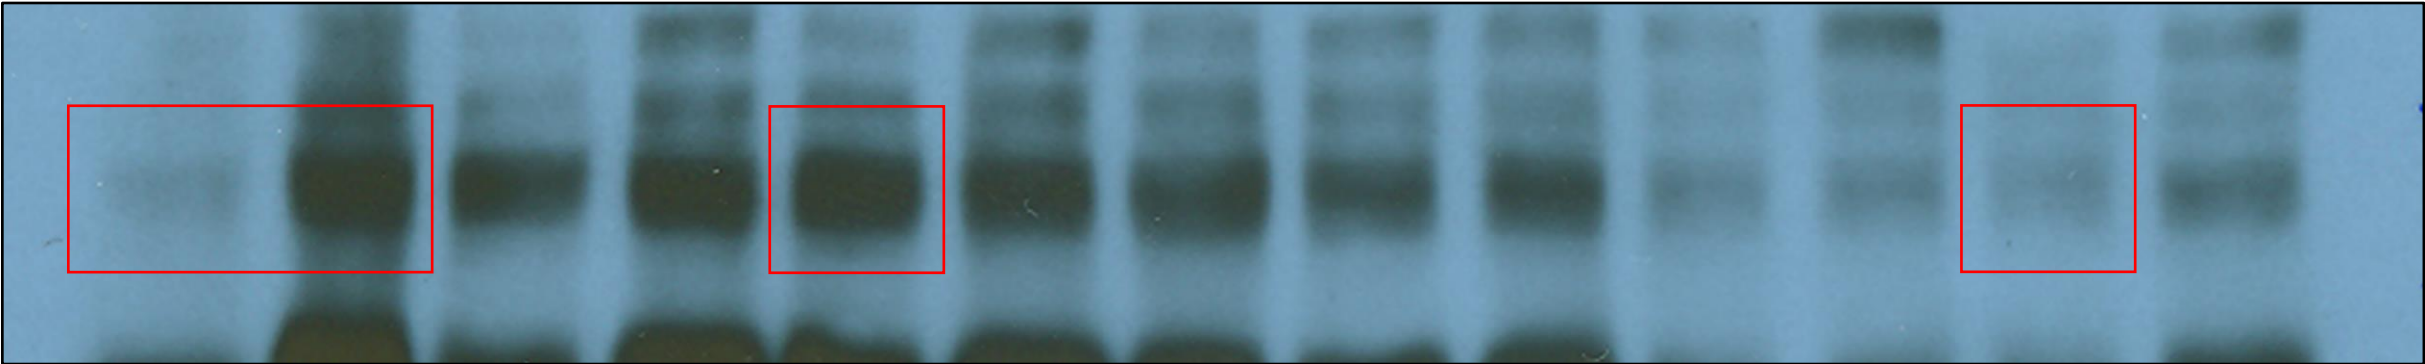

Anti-GAPDH

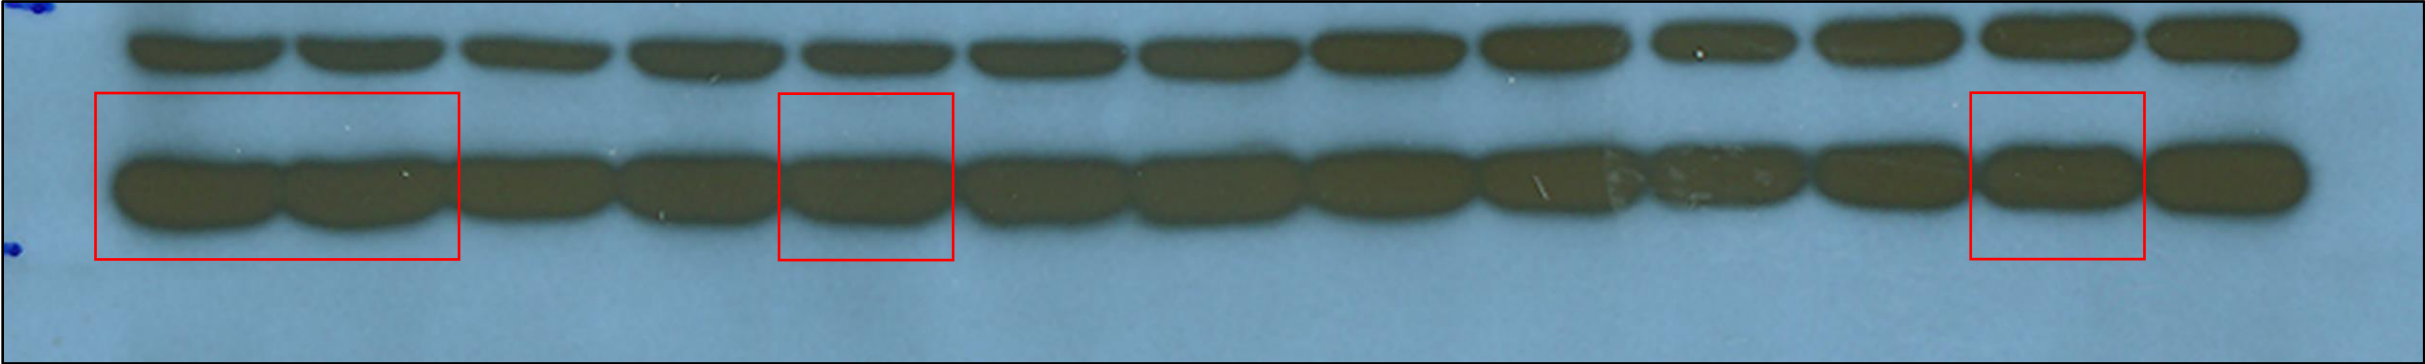

|         |   |      |   |   |   |          |   |   |   |   |   |   |   |      |
|---------|---|------|---|---|---|----------|---|---|---|---|---|---|---|------|
| -       | + | +    | + | + | + | +        | + | + | + | + | + | + | + | NaCl |
| Control |   | Mock |   |   |   | NFAT5 KD |   |   |   |   |   |   |   |      |

Uncropped image of the Western blot shown in Supplemental Figure 4A.

## Uncropped blot for Supplemental Figure 4B

Anti-NFAT5

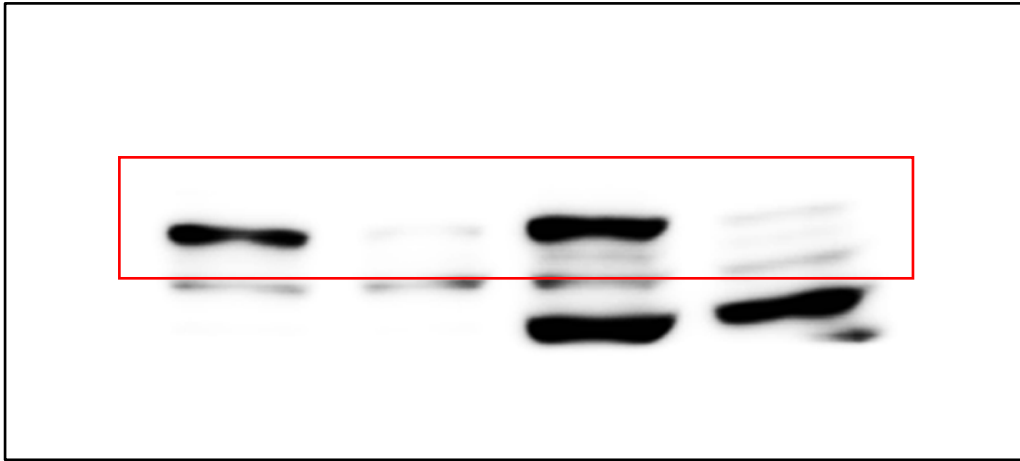

Anti- $\beta$ -actin

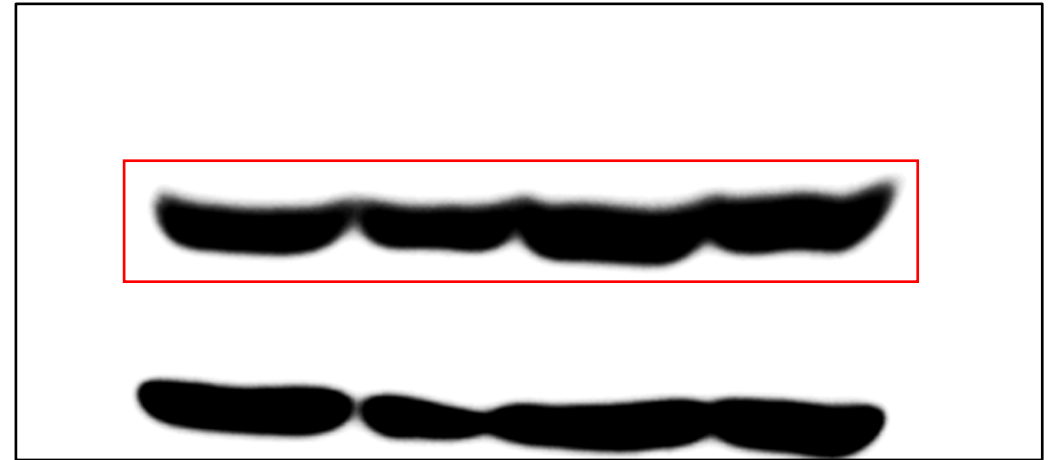

Uncropped image of the Western blot shown in Supplemental Figure 4B.

## Uncropped blot for Supplemental Figure 4C

Anti-NFAT5

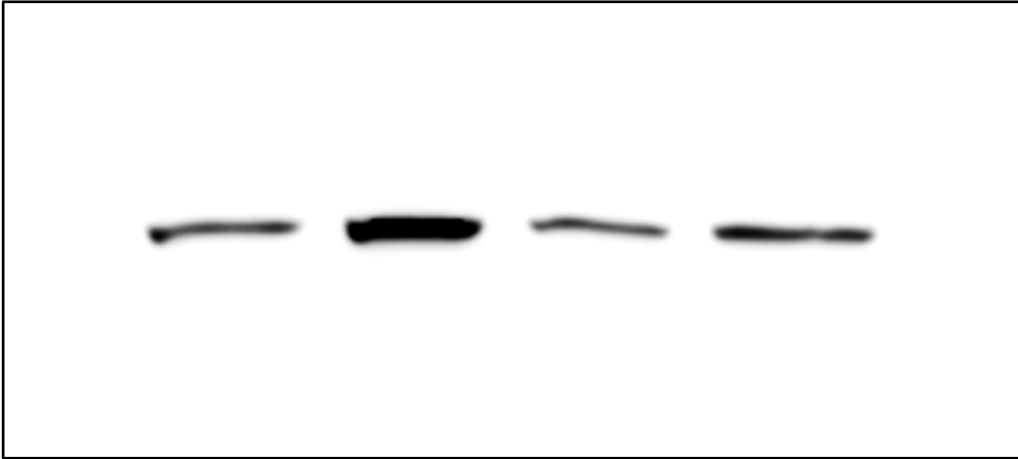

Anti- $\beta$ -actin

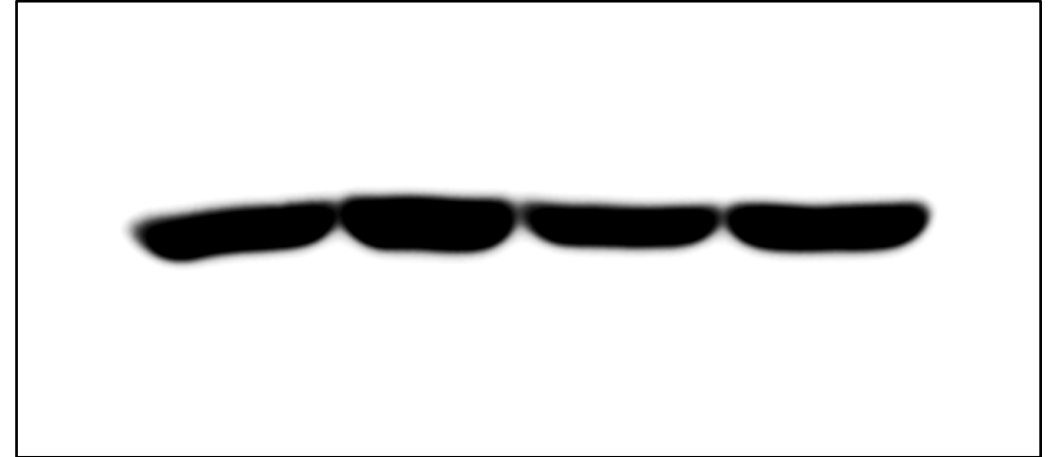

Uncropped image of the Western blot shown in Supplemental Figure 4C.

## Uncropped blot for Supplemental Figure 4D

Anti-NFAT5

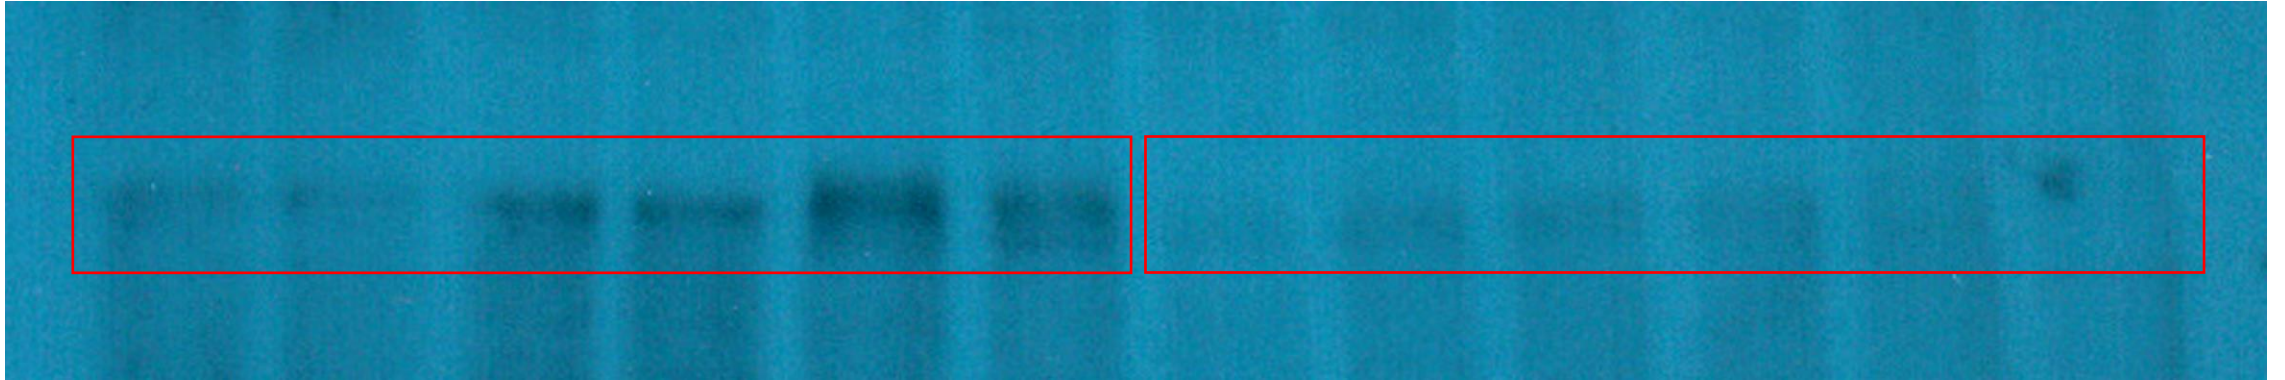

Anti- $\beta$ -actin

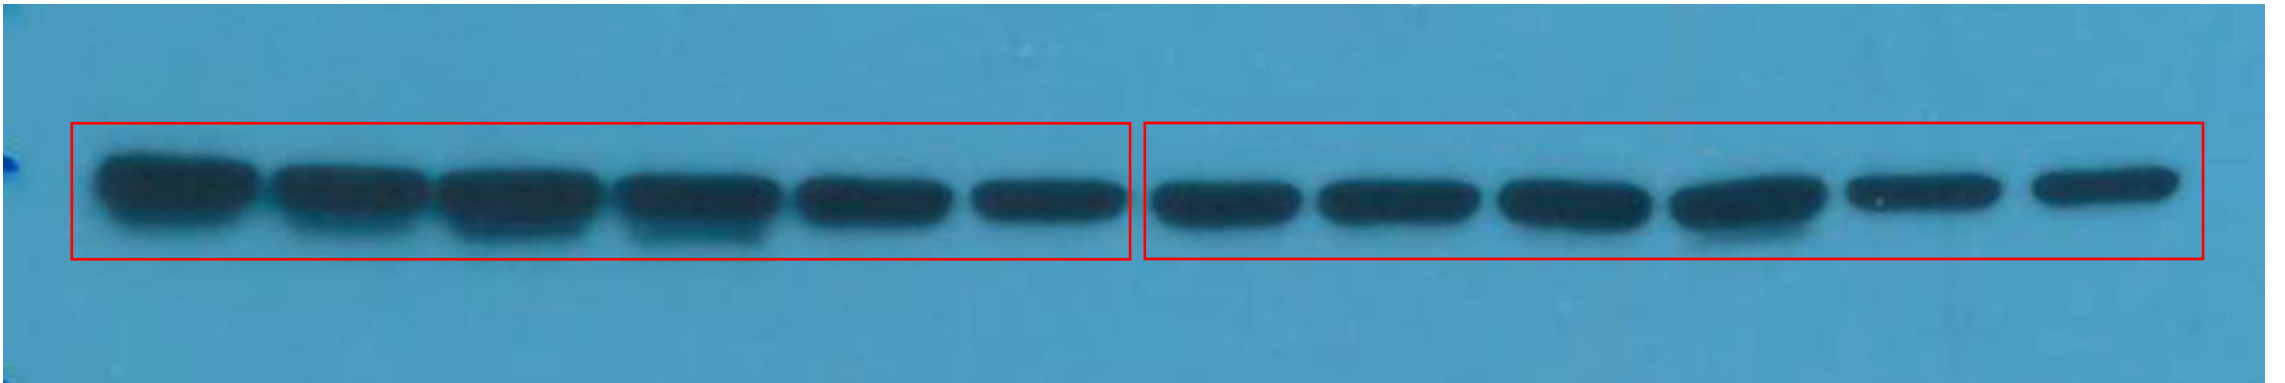

*Nfat5<sup>fl/fl</sup>*

*LysM-Cre;Nfat5<sup>fl/fl</sup>*

Uncropped image of the Western blot shown in Supplemental Figure 4D.
